# Supplementary material for: Earth System Music: the methodology and reach of music generated from the United Kingdom Earth System Model
Source: Copernicus journal article supplement (doi:10.5194/gc-2019-28), 2020-01-17
Supplement: Supplementary file 1 [file gc-2019-28-supplement.zip]

# Pre-industrial vivace

A procedurally generated piece

UK Earth System Model

Arranged by Lee de Mora

$\text{♩} = 148$

Piano, Track 0

Piano, Track 2

Piano, Track 4

Pno.

Pno.

Pno.

The musical score is written for three piano tracks and three piano parts. The tempo is marked as  $\text{♩} = 148$ . The score is divided into two systems. The first system contains Piano Tracks 0, 2, and 4. Piano Track 0 features a rapid, repetitive eighth-note melody in the right hand. Piano Tracks 2 and 4 provide harmonic support with longer note values and some melodic movement. The second system contains three piano parts (Pno.). The first Pno. part continues the rapid eighth-note melody from Track 0. The second Pno. part has a more complex melodic line with some triplets. The third Pno. part provides a simple harmonic accompaniment in the bass line.

5

Pno.

Pno.

Pno.

This system contains measures 5 and 6 of a musical piece. It features three staves, each labeled 'Pno.' on the left. The top staff is in treble clef and contains a complex, rapid sixteenth-note arpeggiated pattern. The middle staff is also in treble clef and features a melodic line with eighth and sixteenth notes, including a long slur spanning across the measure boundary. The bottom staff is in bass clef and contains a simple bass line with quarter and eighth notes. A vertical bar line separates measure 5 from measure 6.

7

Pno.

Pno.

Pno.

This system contains measures 7 and 8 of the musical piece. It features three staves, each labeled 'Pno.' on the left. The top staff continues the rapid sixteenth-note arpeggiated pattern from the previous system. The middle staff continues the melodic line with eighth and sixteenth notes, also featuring a long slur. The bottom staff continues the bass line with quarter and eighth notes. A vertical bar line separates measure 7 from measure 8.

9

Pno.

This system contains measures 9 and 10. It features three staves. The top staff is a grand staff with a treble and an alto clef, containing dense sixteenth-note passages. The middle staff is a grand staff with a treble and a bass clef, featuring a melodic line with slurs and ties. The bottom staff is a single bass clef staff with a melodic line and a long tie across the measure boundary.

11

Pno.

This system contains measures 11 and 12. It features three staves. The top staff is a grand staff with a treble and an alto clef, continuing the dense sixteenth-note passages. The middle staff is a grand staff with a treble and a bass clef, with a melodic line that includes a long tie in measure 12. The bottom staff is a single bass clef staff with a melodic line and a long tie across the measure boundary.

13

Pno.

Pno.

Pno.

This system contains measures 13 and 14. The first piano staff (treble clef) features a rapid sixteenth-note scale in measure 13, which continues in measure 14. The second piano staff (treble clef) has a melodic line with eighth and sixteenth notes, including a slur over measures 13 and 14. The third piano staff (bass clef) has a long, low note in measure 13, followed by a melodic line in measure 14 that includes a key signature change to one sharp (F#) in the final measure.

15

Pno.

Pno.

Pno.

This system contains measures 15 and 16. The first piano staff (treble clef) has a rapid sixteenth-note scale in measure 15, continuing into measure 16. The second piano staff (treble clef) has a melodic line with eighth and sixteenth notes, including a slur over measures 15 and 16. The third piano staff (bass clef) has a long, low note in measure 15, followed by a melodic line in measure 16 that includes a key signature change to one sharp (F#) in the final measure.

17

Pno.

Pno.

Pno.

This system contains measures 17 and 18. The first piano part (top) features a complex, rapid ascending and descending scale-like pattern in both hands, with many beamed sixteenth notes. The second piano part (middle) has a more melodic line in the right hand with some grace notes, and a bass line in the left hand. The third piano part (bottom) consists of a simple bass line in the left hand.

19

Pno.

Pno.

Pno.

This system contains measures 19 and 20. The first piano part (top) continues with a rapid, intricate scale-like pattern. The second piano part (middle) features a melodic line in the right hand with grace notes and a bass line in the left hand. The third piano part (bottom) has a simple bass line in the left hand.

21

Pno.

Pno.

Pno.

This system contains measures 21 and 22. The first piano part (top) features a rapid, ascending sixteenth-note scale in the right hand, with the left hand playing a steady eighth-note accompaniment. The second piano part (middle) consists of a single melodic line with a long, expressive slur spanning both measures. The third piano part (bottom) provides a harmonic foundation with a few notes and a long, sustained chord in the right hand.

23

Pno.

Pno.

Pno.

This system contains measures 23 and 24. The first piano part (top) continues with a complex, flowing melodic line in the right hand, supported by a rhythmic eighth-note pattern in the left hand. The second piano part (middle) features a melodic phrase in the right hand that begins in measure 23 and concludes with a long, sustained note in measure 24. The third piano part (bottom) maintains a simple harmonic support with a few notes and a long, sustained chord in the right hand.

25

Pno.

Pno.

Pno.

This system contains measures 25 and 26. The first piano part (top) is in treble clef and features a complex, rapid melodic line with many beamed sixteenth and thirty-second notes, including some triplets. The second piano part (middle) is in treble clef and plays a more melodic line with eighth and quarter notes, some beamed together. The third piano part (bottom) is in bass clef and plays a slower, more rhythmic line with quarter and half notes, some beamed together. The measures are separated by a double bar line.

27

Pno.

Pno.

Pno.

This system contains measures 27 and 28. The first piano part (top) continues the rapid, complex melodic line from measure 25. The second piano part (middle) is in treble clef and plays a melodic line with eighth and quarter notes, some beamed together. The third piano part (bottom) is in bass clef and plays a slower, more rhythmic line with quarter and half notes, some beamed together. The measures are separated by a double bar line.

29

Pno.

Pno.

Pno.

31

Pno.

Pno.

Pno.



33

Pno.

Pno.

Pno.

35

Pno.

Pno.

Pno.

37

Pno.

Pno.

Pno.

This system contains measures 37 and 38. Measure 37 features a complex piano texture with rapid sixteenth-note runs in the right hand of the grand staff, while the left hand plays a steady eighth-note accompaniment. Measure 38 continues this texture, with the right hand descending and the left hand maintaining its rhythmic pattern. The third piano part in the system provides a bass line with quarter and eighth notes.

39

Pno.

Pno.

Pno.

This system contains measures 39 and 40. Measure 39 shows a continuation of the rapid sixteenth-note passages in the right hand of the grand staff, with the left hand providing a more active accompaniment. Measure 40 features a change in texture, with the right hand playing a series of eighth-note chords and the left hand playing a descending eighth-note line. The third piano part continues with a steady bass line.

41

Pno.

Pno.

Pno.

This system contains measures 41 and 42. The first piano part (top) features a complex, rapid sixteenth-note melody in the right hand, with a more active left hand. The second piano part (middle) has a steady eighth-note accompaniment in the right hand and a melodic line in the left hand. The third piano part (bottom) provides a harmonic foundation with sustained chords in the right hand and a moving bass line in the left hand.

43

Pno.

Pno.

Pno.

This system contains measures 43, 44, and 45. The first piano part (top) continues with a highly technical, rapid sixteenth-note passage. The second piano part (middle) features a melodic line in the right hand and a supporting bass line in the left hand. The third piano part (bottom) maintains a steady accompaniment with sustained chords in the right hand and a moving bass line in the left hand.

46

Pno.

Pno.

Pno.

This system contains measures 46 and 47. The first piano staff (treble clef) features a rapid sixteenth-note scale in measure 46, followed by a half-note rest, and then a descending sixteenth-note scale in measure 47. The second piano staff (treble clef) plays a series of eighth-note chords in measure 46, followed by a half-note rest, and then a descending eighth-note scale in measure 47. The third piano staff (bass clef) plays a half-note chord in measure 46, followed by a half-note rest, and then a descending eighth-note scale in measure 47.

48

Pno.

Pno.

Pno.

This system contains measures 48 and 49. The first piano staff (treble clef) features a rapid sixteenth-note scale in measure 48, followed by a half-note rest, and then a descending sixteenth-note scale in measure 49. The second piano staff (treble clef) plays a series of eighth-note chords in measure 48, followed by a half-note rest, and then a descending eighth-note scale in measure 49. The third piano staff (bass clef) plays a half-note chord in measure 48, followed by a half-note rest, and then a descending eighth-note scale in measure 49.

50

Pno.

Pno.

Pno.

This system contains measures 50, 51, and 52. Measure 50 features a complex texture with rapid sixteenth-note runs in the upper right hand and a more melodic line in the lower right hand. Measure 51 continues these patterns with some rests. Measure 52 shows a shift in the lower right hand, moving to a lower register with sustained notes.

53

Pno.

Pno.

Pno.

This system contains measures 53, 54, and 55. Measure 53 has a very active upper right hand with many beamed sixteenth notes. Measure 54 shows a continuation of this activity, with the lower right hand providing a steady accompaniment. Measure 55 concludes the system with a final chordal structure in the upper right hand and a sustained note in the lower right hand.

55

Pno.

Pno.

Pno.

This system contains measures 55 and 56. Measure 55 features a complex piano texture with multiple voices. The upper staves have rapid sixteenth-note passages, while the lower staves provide harmonic support with sustained notes and moving lines. Measure 56 continues this texture, with some notes being held across the bar line. The notation includes various note values, rests, and slurs to indicate phrasing.

57

Pno.

Pno.

Pno.

This system contains measures 57 and 58. Measure 57 is characterized by a very dense and fast-moving piano texture, primarily in the upper staves, consisting of rapid sixteenth-note runs. The lower staves have more sparse accompaniment. Measure 58 shows a continuation of this texture, with some notes being held across the bar line. The notation includes various note values, rests, and slurs to indicate phrasing.

59

Pno.

Pno.

Pno.

This system contains measures 59 and 60. It features three piano parts. The first piano part (top) is in treble clef and contains rapid sixteenth-note passages in both measures. The second piano part (middle) is in treble clef; measure 59 has a single note, while measure 60 has a melodic line with slurs. The third piano part (bottom) is in bass clef and features a simple melodic line with slurs across both measures.

61

Pno.

Pno.

Pno.

This system contains measures 61 and 62. It features three piano parts. The first piano part (top) is in treble clef and contains continuous sixteenth-note passages. The second piano part (middle) is in treble clef; measure 61 has a few notes, while measure 62 has a single note. The third piano part (bottom) is in bass clef and features a melodic line with slurs across both measures.

63

Pno.

Pno.

Pno.

This system contains measures 63 and 64. The first piano part (top) has a treble clef and plays a continuous eighth-note melody with slurs. The second piano part (middle) has a treble clef and plays a melody of eighth and sixteenth notes. The third piano part (bottom) has a bass clef and plays a sparse melody with long intervals and slurs.

65

Pno.

Pno.

Pno.

This system contains measures 65 and 66. The first piano part (top) continues the eighth-note melody from measure 63. The second piano part (middle) has a treble clef and plays a melody with slurs. The third piano part (bottom) has a treble clef and plays a sparse melody with long intervals.



67

Pno.

Pno.

Pno.

This system contains measures 67 and 68. The first piano staff (top) has a treble clef and plays a rapid ascending and descending sixteenth-note scale. The second piano staff (middle) has a treble clef and plays a steady eighth-note accompaniment. The third piano staff (bottom) has a treble clef and plays a melodic line with some rests and a long phrase spanning the measure boundary.

69

Pno.

Pno.

Pno.

This system contains measures 69 and 70. The first piano staff (top) continues with a complex sixteenth-note pattern. The second piano staff (middle) has a treble clef and plays a melodic line with some rests and a long phrase spanning the measure boundary. The third piano staff (bottom) has a bass clef and plays a melodic line with some rests and a long phrase spanning the measure boundary.

72

Pno.

Pno.

Pno.

This system contains measures 72 and 73. The first piano staff (top) has a treble clef and a key signature of one flat. Measure 72 features a complex melodic line with eighth and sixteenth notes, including a triplet. Measure 73 continues this line with a half note and a quarter note. The second piano staff (middle) has a treble clef. Measure 72 has a half note and a quarter note. Measure 73 has a half note and a quarter note. The third piano staff (bottom) has a bass clef. Measure 72 has a half note. Measure 73 has a half note.

74

Pno.

Pno.

Pno.

This system contains measures 74 and 75. The first piano staff (top) has a treble clef and a key signature of one flat. Measure 74 features a complex melodic line with eighth and sixteenth notes, including a triplet. Measure 75 continues this line with a half note and a quarter note. The second piano staff (middle) has a treble clef. Measure 74 has a half note and a quarter note. Measure 75 has a half note and a quarter note. The third piano staff (bottom) has a bass clef. Measure 74 has a half note. Measure 75 has a half note.

76

Pno.

Pno.

Pno.

78

Pno.

Pno.

Pno.

80

Pno.

Pno.

Pno.

This system contains measures 80 and 81. Measure 80 features a complex texture with multiple sixteenth-note runs in the upper right hand and a more melodic line in the lower right hand. Measure 81 continues these patterns, with the upper right hand playing a series of ascending and descending sixteenth-note figures. The lower right hand provides a harmonic foundation with longer note values and some grace notes.

82

Pno.

Pno.

Pno.

This system contains measures 82 and 83. Measure 82 is characterized by dense, rapid sixteenth-note passages in both the upper and lower right hands. Measure 83 shows a continuation of these fast-moving lines, with the upper right hand reaching higher registers and the lower right hand maintaining a similar rhythmic intensity. The left hand plays a more sustained, melodic line with some grace notes.

84

Pno.

This system contains measures 84 and 85 of a piano piece. It features three staves. The top staff is in treble clef and contains a complex, rapid sixteenth-note melody with many beamed notes. The middle staff is in treble clef and contains a similar but slightly less dense melody. The bottom staff is in bass clef and contains a more melodic line with some slurs and ties. The music is written in a single system with a repeat sign at the end of measure 85.

86

Pno.

This system contains measures 86 and 87 of the piano piece. It also features three staves. The top staff continues the rapid sixteenth-note melody from the previous system. The middle staff has a more rhythmic, eighth-note pattern. The bottom staff has a melodic line with some slurs. The music is written in a single system with a repeat sign at the end of measure 87.

88

Pno.

Pno.

Pno.

This musical score segment contains three systems of piano (Pno.) notation, each consisting of a grand staff (treble and bass clefs). The first system (measures 88-90) features a right-hand melody with eighth and sixteenth notes and a left-hand accompaniment of eighth notes. The second system (measures 91-93) shows a right-hand melody with a long slur and a left-hand accompaniment of eighth notes. The third system (measures 94-96) continues the right-hand melody with a long slur and a left-hand accompaniment of eighth notes. The notation includes various musical symbols such as notes, rests, slurs, and bar lines.
