# Supplementary material for: Earth System Music: the methodology and reach of music generated from the United Kingdom Earth System Model
Source: Copernicus journal article supplement (doi:10.5194/gc-2019-28), 2020-01-17
Supplement: Supplementary file 2 [file gc-2019-28-supplement.zip]

# Giant steps spin up

A procedurally generated piece

UK Earth System Model  
Arranged by Lee de Mora

$\text{♩} = 146$

Piano, Track 0

Piano, Track 2

Piano, Track 4

3

Pno.

Pno.

Pno.

8

Pno.

Pno.

Pno.

Musical score for piano, measures 8-13. The score is written for three staves, each labeled 'Pno.'. The key signature is B-flat major (two flats). The first staff (treble clef) features a melodic line with a half note G4, a quarter note A4, and a half note B4, followed by a series of eighth notes. The second staff (treble clef) features a melodic line with a half note G4, a quarter note A4, and a half note B4, followed by a series of eighth notes. The third staff (bass clef) features a melodic line with a half note G4, a quarter note A4, and a half note B4, followed by a series of eighth notes.

14

Pno.

Pno.

Pno.

Musical score for piano, measures 14-19. The score is written for three staves, each labeled 'Pno.'. The key signature is B-flat major (two flats). The first staff (treble clef) features a melodic line with a half note G4, a quarter note A4, and a half note B4, followed by a series of eighth notes. The second staff (treble clef) features a melodic line with a half note G4, a quarter note A4, and a half note B4, followed by a series of eighth notes. The third staff (bass clef) features a melodic line with a half note G4, a quarter note A4, and a half note B4, followed by a series of eighth notes.

19

Piano score for measures 19-21. The score is written for three staves, each labeled "Pno." on the left. The key signature is B-flat major (two flats). The first staff (treble clef) features a melodic line with a long slur across measures 19 and 20, and a final note in measure 21. The second staff (bass clef) contains a complex, fast-moving accompaniment with many beamed sixteenth and thirty-second notes. The third staff (bass clef) provides a harmonic foundation with sustained notes and some movement in measure 21.

22

Piano score for measures 22-24. The score is written for three staves, each labeled "Pno." on the left. The key signature remains B-flat major. The first staff (treble clef) begins with a rapid sixteenth-note scale in measure 22, followed by a melodic phrase in measure 23 and a whole note in measure 24. The second staff (bass clef) features a sustained note in measure 22, followed by a melodic phrase in measure 23 and a whole note in measure 24. The third staff (bass clef) provides a harmonic foundation with sustained notes and some movement in measure 24.

25

Pno.

Pno.

Pno.

This system contains measures 25 through 28 of a musical score for three piano parts. The key signature is B-flat major (two flats). The first piano part (top) features a melodic line in the right hand with eighth and sixteenth notes, and a bass line with half notes and whole notes. The second piano part (middle) has a more active right hand with eighth notes and a bass line with half notes. The third piano part (bottom) consists of a bass line with half notes and whole notes, often tied across measures.

29

Pno.

Pno.

Pno.

This system contains measures 29 through 32 of the musical score. The first piano part (top) continues its melodic development with some sixteenth-note passages. The second piano part (middle) shows a more complex texture with sixteenth-note runs in the right hand. The third piano part (bottom) maintains a steady bass line with half notes and whole notes, providing harmonic support.

35

Piano score for measures 35-37. The score is written for three staves, each labeled "Pno." on the left. The key signature is B-flat major (two flats). The first staff (top) features a bass clef and a treble clef, with a long melodic line in the bass clef and a more active line in the treble clef. The second staff (middle) features a bass clef and a treble clef, with a long melodic line in the bass clef and a more active line in the treble clef. The third staff (bottom) features a bass clef and a treble clef, with a long melodic line in the bass clef and a more active line in the treble clef.

38

Piano score for measures 38-40. The score is written for three staves, each labeled "Pno." on the left. The key signature is B-flat major (two flats). The first staff (top) features a bass clef and a treble clef, with a long melodic line in the bass clef and a more active line in the treble clef. The second staff (middle) features a bass clef and a treble clef, with a long melodic line in the bass clef and a more active line in the treble clef. The third staff (bottom) features a bass clef and a treble clef, with a long melodic line in the bass clef and a more active line in the treble clef.

Piano score for measures 41-42, featuring three staves labeled "Pno." in a key signature of three flats (B-flat, E-flat, A-flat).

Measure 41: The first staff (Pno.) contains a melodic line in the bass clef, starting with a half note G2, followed by quarter notes F2, E2, D2, and a half note C2. The second staff (Pno.) contains a melodic line in the treble clef, starting with a half note G4, followed by quarter notes F4, E4, D4, and a half note C4. The third staff (Pno.) contains a single half note G2.

Measure 42: The first staff (Pno.) contains a melodic line in the bass clef, starting with a half note G2, followed by quarter notes F2, E2, D2, and a half note C2. The second staff (Pno.) contains a melodic line in the bass clef, starting with a half note G2, followed by quarter notes F2, E2, D2, and a half note C2. The third staff (Pno.) contains a single half note G2.

Piano score for measures 43-45, featuring three staves labeled "Pno." in a key signature of three flats (B-flat, E-flat, A-flat).

Measure 43: The first staff (Pno.) contains a melodic line in the bass clef, starting with a half note G2, followed by quarter notes F2, E2, D2, and a half note C2. The second staff (Pno.) contains a melodic line in the treble clef, starting with a half note G4, followed by quarter notes F4, E4, D4, and a half note C4. The third staff (Pno.) contains a single half note G2.

Measure 44: The first staff (Pno.) contains a melodic line in the bass clef, starting with a half note G2, followed by quarter notes F2, E2, D2, and a half note C2. The second staff (Pno.) contains a melodic line in the bass clef, starting with a half note G2, followed by quarter notes F2, E2, D2, and a half note C2. The third staff (Pno.) contains a single half note G2.

Measure 45: The first staff (Pno.) contains a melodic line in the bass clef, starting with a half note G2, followed by quarter notes F2, E2, D2, and a half note C2. The second staff (Pno.) contains a melodic line in the bass clef, starting with a half note G2, followed by quarter notes F2, E2, D2, and a half note C2. The third staff (Pno.) contains a single half note G2.

46

Piano score for measures 46-50. The score is written for three staves, each labeled "Pno." on the left. The key signature is B-flat major (two flats). The first staff (top) features a complex melodic line with many beamed sixteenth and thirty-second notes, often with slurs. The second staff (middle) has a more melodic line with slurs and some beamed eighth notes. The third staff (bottom) provides a harmonic foundation with long, sustained notes, mostly half notes and whole notes, some with slurs.

51

Piano score for measures 51-54. The score is written for three staves, each labeled "Pno." on the left. The key signature is B-flat major (two flats). The first staff (top) continues the complex melodic line with many beamed sixteenth and thirty-second notes, often with slurs. The second staff (middle) has a more melodic line with slurs and some beamed eighth notes. The third staff (bottom) provides a harmonic foundation with long, sustained notes, mostly half notes and whole notes, some with slurs.

55

Pno.

Pno.

Pno.

This section contains three systems of piano accompaniment for measures 55, 56, and 57. The key signature is B-flat major (two flats). The first system (measure 55) features a complex texture with multiple voices in both staves, including sixteenth-note runs and sustained chords. The second system (measure 56) shows a more active bass line with eighth-note patterns and a sustained bass note in the right hand. The third system (measure 57) continues the melodic lines with sustained notes and moving bass lines.

58

Pno.

Pno.

Pno.

This section contains three systems of piano accompaniment for measures 58, 59, 60, and 61. The key signature remains B-flat major. The first system (measure 58) is characterized by dense, rapid sixteenth-note passages in both hands. The second system (measure 59) features a more melodic bass line with eighth-note patterns and sustained notes in the right hand. The third system (measure 60) continues the melodic development with sustained notes and moving bass lines. The fourth system (measure 61) concludes the section with sustained notes and a final chordal structure.



63

Piano score for measures 63-65. The score is written for three staves, each labeled "Pno." on the left. The key signature is three flats (B-flat, E-flat, A-flat). The first staff (top) features a complex, rapid melodic line with many beamed sixteenth and thirty-second notes. The second staff (middle) has a long, sustained melodic line in the bass clef, with a few notes in the treble clef. The third staff (bottom) has a long, sustained melodic line in the bass clef, with a few notes in the treble clef.

66

Piano score for measures 66-68. The score is written for three staves, each labeled "Pno." on the left. The key signature is three flats (B-flat, E-flat, A-flat). The first staff (top) features a complex, rapid melodic line with many beamed sixteenth and thirty-second notes. The second staff (middle) has a long, sustained melodic line in the bass clef, with a few notes in the treble clef. The third staff (bottom) has a long, sustained melodic line in the bass clef, with a few notes in the treble clef.

69

Pno.

Pno.

Pno.

72

Pno.

Pno.

Pno.

75

Pno.

Pno.

Pno.

This system contains measures 75 through 78. The first piano part (top) begins with a whole note chord in measure 75, followed by a series of eighth and sixteenth notes with slurs. The second piano part (middle) features a more active melody with eighth and sixteenth notes, including some triplets. The third piano part (bottom) is simpler, consisting of whole notes and half notes. All parts are in a key with two flats (B-flat and E-flat).

79

Pno.

Pno.

Pno.

This system contains measures 79 through 81. The first piano part (top) continues with a melodic line of eighth and sixteenth notes. The second piano part (middle) has a more complex texture with many beamed sixteenth notes. The third piano part (bottom) remains relatively simple with half and whole notes. The key signature remains two flats.

82

Pno.

Pno.

Pno.

This musical system covers measures 82, 83, and 84. It consists of three piano parts, each with a grand staff (treble and bass clefs). The key signature is three flats (B-flat, E-flat, A-flat). Measure 82 shows the first piano part with a half note G4 and a half note F#4. The second piano part has a half note G4 and a half note F#4. The third piano part has a half note G4 and a half note F#4. Measure 83 shows the first piano part with a half note G4 and a half note F#4. The second piano part has a half note G4 and a half note F#4. The third piano part has a half note G4 and a half note F#4. Measure 84 shows the first piano part with a half note G4 and a half note F#4. The second piano part has a half note G4 and a half note F#4. The third piano part has a half note G4 and a half note F#4.

85

Pno.

Pno.

Pno.

This musical system covers measures 85, 86, and 87. It consists of three piano parts, each with a grand staff (treble and bass clefs). The key signature is three flats (B-flat, E-flat, A-flat). Measure 85 shows the first piano part with a half note G4 and a half note F#4. The second piano part has a half note G4 and a half note F#4. The third piano part has a half note G4 and a half note F#4. Measure 86 shows the first piano part with a half note G4 and a half note F#4. The second piano part has a half note G4 and a half note F#4. The third piano part has a half note G4 and a half note F#4. Measure 87 shows the first piano part with a half note G4 and a half note F#4. The second piano part has a half note G4 and a half note F#4. The third piano part has a half note G4 and a half note F#4.

88

Pno.

Pno.

Pno.

This musical system contains measures 88, 89, and 90. It features three piano parts. The top part begins with a whole rest in measure 88, followed by a half note G4 in measure 89, and a half note F#4 in measure 90. The middle part has a continuous eighth-note melody in measure 88, a half note G4 in measure 89, and a half note F#4 in measure 90. The bottom part has a whole note G4 in measure 88, a whole note G4 in measure 89, and a whole note F#4 in measure 90. The key signature has three flats (B-flat, E-flat, A-flat).

91

Pno.

Pno.

Pno.

This musical system contains measures 91, 92, and 93. The top part has a half note G4 in measure 91, a half note F#4 in measure 92, and a half note G4 in measure 93. The middle part has a continuous eighth-note melody in measure 91, a half note G4 in measure 92, and a half note F#4 in measure 93. The bottom part has a whole note G4 in measure 91, a whole note G4 in measure 92, and a whole note F#4 in measure 93. The key signature has three flats (B-flat, E-flat, A-flat).

94

Pno.

Pno.

Pno.

This musical system covers measures 94, 95, and 96. It consists of three piano parts. The first piano part (top) has a treble clef and a key signature of two flats. It features a melodic line with eighth and sixteenth notes, often beamed together, and includes a long slur spanning measures 95 and 96. The second piano part (middle) has a treble clef and a key signature of two flats. It contains a dense texture of sixteenth-note runs and chords, with a long slur also spanning measures 95 and 96. The third piano part (bottom) has a treble clef and a key signature of two flats. It plays a more sparse, sustained melody with long notes and a final long slur in measure 96.

97

Pno.

Pno.

Pno.

This musical system covers measures 97 and 98. It consists of three piano parts. The first piano part (top) has a treble clef and a key signature of two flats. It continues the melodic development with eighth and sixteenth notes and a long slur across measure 98. The second piano part (middle) has a treble clef and a key signature of two flats. It features a complex texture with many beamed sixteenth notes and a long slur across measure 98. The third piano part (bottom) has a treble clef and a key signature of two flats. It plays a sustained, low-register melody with long notes and a long slur across measure 98.

99

Pno.

Pno.

Pno.
