# Supplementary material for: Earth System Music: the methodology and reach of music generated from the United Kingdom Earth System Model
Source: Copernicus journal article supplement (doi:10.5194/gc-2019-28), 2020-01-17
Supplement: Supplementary file 3 [file gc-2019-28-supplement.zip]

# Earth System Allegro

A procedurally generated piece

UK Earth System Model

Arranged by Lee de Mora

$\text{♩} = 98$

Piano, Track 0

Piano, Track 2

Pno.

Pno.

Pno.

Pno.

The musical score is written for four piano tracks, each consisting of a grand staff (treble and bass clef). The tempo is marked as  $\text{♩} = 98$ . The key signature is one flat (Bb). The score is divided into four systems, each containing two staves. The first system is labeled 'Piano, Track 0' and 'Piano, Track 2'. The second system is labeled 'Pno.' and 'Pno.'. The third system is labeled 'Pno.' and 'Pno.'. The fourth system is labeled 'Pno.' and 'Pno.'. The tempo is indicated as  $\text{♩} = 98$ . The key signature is one flat (Bb). The first system has a measure number '3' at the start of the first staff. The second system has a measure number '5' at the start of the first staff. The third system has a measure number '7' at the start of the first staff. The fourth system has a measure number '9' at the start of the first staff.

7

Pno.

Pno.

9

Pno.

Pno.

11

Pno.

Pno.

13

Pno.

This system contains measures 13 and 14. Measure 13 features a right-hand part with a series of eighth-note chords and a left-hand part with a melodic line of eighth notes. Measure 14 continues the right-hand part with a descending eighth-note scale and the left-hand part with a steady eighth-note accompaniment.

15

Pno.

This system contains measures 15 and 16. Measure 15 shows a right-hand part with a melodic line of eighth notes and a left-hand part with a steady eighth-note accompaniment. Measure 16 continues the right-hand part with a descending eighth-note scale and the left-hand part with a steady eighth-note accompaniment.

17

Pno.

This system contains measures 17 and 18. Measure 17 features a right-hand part with a series of eighth-note chords and a left-hand part with a melodic line of eighth notes. Measure 18 continues the right-hand part with a descending eighth-note scale and the left-hand part with a steady eighth-note accompaniment.

19

Pno.

Musical score for piano, measures 19-21. The score is written for two systems, each with a grand staff (treble and bass clef). The first system (measures 19-21) features a complex, fast-moving melody in the right hand of the first system, with many sixteenth and thirty-second notes. The left hand of the first system and both hands of the second system play a more rhythmic, eighth-note accompaniment. The second system (measures 22-24) continues the fast melody in the right hand, while the left hand plays a steady eighth-note pattern. The third system (measures 25-27) shows the fast melody continuing in the right hand, with the left hand providing a consistent eighth-note accompaniment.

22

Pno.

Musical score for piano, measures 22-24. The score is written for two systems, each with a grand staff (treble and bass clef). The first system (measures 22-24) features a complex, fast-moving melody in the right hand of the first system, with many sixteenth and thirty-second notes. The left hand of the first system and both hands of the second system play a more rhythmic, eighth-note accompaniment. The second system (measures 25-27) continues the fast melody in the right hand, while the left hand plays a steady eighth-note pattern. The third system (measures 28-30) shows the fast melody continuing in the right hand, with the left hand providing a consistent eighth-note accompaniment.
