# Supplementary material for: Earth System Music: the methodology and reach of music generated from the United Kingdom Earth System Model
Source: Copernicus journal article supplement (doi:10.5194/gc-2019-28), 2020-01-17
Supplement: Supplementary file 4 [file gc-2019-28-supplement.zip]

# Sea Surface Temperature Aria

A procedurally generated piece

UK Earth System Model  
Arranged by L. de Mora

$\text{♩} = 100$

Piano, Track 0

Piano, Track 2

Piano, Track 4

4

Pno.

Pno.

Pno.

4

7

Piano score for measures 7-9. The score is written for three systems, each labeled "Pno." on the left. Each system consists of a grand staff (bass and treble clefs) with a key signature of two sharps (F# and C#). The notation includes rests, eighth notes, and triplets. The first system shows rests in the bass and treble staves. The second system shows rests in the bass and treble staves, with eighth notes and triplets in the bass staff. The third system shows eighth notes and triplets in the bass staff.

10

Piano score for measures 10-11. The score is written for three systems, each labeled "Pno." on the left. Each system consists of a grand staff (bass and treble clefs) with a key signature of two sharps (F# and C#). The notation includes rests, eighth notes, and triplets. The first system shows rests in the bass and treble staves. The second system shows eighth notes and triplets in the bass staff. The third system shows eighth notes and triplets in the bass staff.

12

Piano score for measures 12 and 13. The score is written for three staves, each labeled "Pno." on the left. The key signature is two sharps (F# and C#). The first staff (top) is a grand staff with a bass clef and a treble clef, showing whole rests in both hands. The second staff (middle) is a grand staff with a bass clef and a treble clef, showing whole rests in both hands. The third staff (bottom) is a grand staff with a bass clef and a treble clef, showing whole rests in both hands.

14

Piano score for measures 14 and 15. The score is written for three staves, each labeled "Pno." on the left. The key signature is two sharps (F# and C#). The first staff (top) is a grand staff with a bass clef and a treble clef, showing whole rests in both hands. The second staff (middle) is a grand staff with a bass clef and a treble clef, showing whole rests in both hands. The third staff (bottom) is a grand staff with a bass clef and a treble clef, showing whole rests in both hands.

17

Piano score for measures 17-18, featuring three staves (Pno. 1, Pno. 2, Pno. 3) in D major (two sharps).

**Measure 17:**

- Pno. 1:** Bass clef, whole rest.
- Pno. 2:** Bass clef, whole rest.
- Pno. 3:** Bass clef, eighth-note triplet (F4, G4, A4), eighth-note triplet (B4, C5, D5), eighth-note triplet (E5, F5, G5), eighth-note triplet (A5, B5, C6).

**Measure 18:**

- Pno. 1:** Bass clef, whole rest.
- Pno. 2:** Bass clef, eighth-note triplet (F4, G4, A4), eighth-note triplet (B4, C5, D5), eighth-note triplet (E5, F5, G5), eighth-note triplet (A5, B5, C6).
- Pno. 3:** Bass clef, eighth-note triplet (F4, G4, A4), eighth-note triplet (B4, C5, D5), eighth-note triplet (E5, F5, G5), eighth-note triplet (A5, B5, C6).

19

Piano score for measures 19-20, featuring three staves (Pno. 1, Pno. 2, Pno. 3) in D major (two sharps).

**Measure 19:**

- Pno. 1:** Bass clef, whole rest.
- Pno. 2:** Bass clef, whole rest.
- Pno. 3:** Bass clef, eighth-note triplet (F4, G4, A4), eighth-note triplet (B4, C5, D5), eighth-note triplet (E5, F5, G5), eighth-note triplet (A5, B5, C6).

**Measure 20:**

- Pno. 1:** Bass clef, whole rest.
- Pno. 2:** Bass clef, eighth-note triplet (F4, G4, A4), eighth-note triplet (B4, C5, D5), eighth-note triplet (E5, F5, G5), eighth-note triplet (A5, B5, C6).
- Pno. 3:** Bass clef, eighth-note triplet (F4, G4, A4), eighth-note triplet (B4, C5, D5), eighth-note triplet (E5, F5, G5), eighth-note triplet (A5, B5, C6).

Piano score for measures 21-23. The score is written for three staves, each labeled "Pno." on the left. The key signature is two sharps (F# and C#). The first staff (top) has a treble clef and a key signature of two sharps. The second staff (middle) has a bass clef and a key signature of two sharps. The third staff (bottom) has a bass clef and a key signature of two sharps. The music features various rhythmic patterns, including eighth and sixteenth notes, and rests. Measure 21 shows a rest in the top staff and eighth notes in the middle and bottom staves. Measure 22 shows a rest in the top staff and eighth notes in the middle and bottom staves. Measure 23 shows a triplet of eighth notes in the top staff, a triplet of eighth notes in the middle staff, and a triplet of eighth notes in the bottom staff.

Piano score for measures 24-26. The score is written for three staves, each labeled "Pno." on the left. The key signature is two sharps (F# and C#). The first staff (top) has a treble clef and a key signature of two sharps. The second staff (middle) has a bass clef and a key signature of two sharps. The third staff (bottom) has a bass clef and a key signature of two sharps. The music features various rhythmic patterns, including eighth and sixteenth notes, and rests. Measure 24 shows a triplet of eighth notes in the top staff, a rest in the middle staff, and eighth notes in the bottom staff. Measure 25 shows a triplet of eighth notes in the top staff, a triplet of eighth notes in the middle staff, and eighth notes in the bottom staff. Measure 26 shows a triplet of eighth notes in the top staff, a triplet of eighth notes in the middle staff, and eighth notes in the bottom staff.



31

Pno.

Pno.

Pno.

The image shows a musical score for three piano parts, labeled 'Pno.' on the left. The score is divided into two measures, 31 and 32, by a vertical bar line. The key signature is three sharps (F#, C#, G#).  
Measure 31:  
- The first piano part (top) has a treble clef and contains a whole note chord consisting of F#, C#, and G#.  
- The second piano part (middle) has a bass clef and contains a whole note chord consisting of F#, C#, and G#.  
- The third piano part (bottom) has a bass clef and contains a whole note chord consisting of F#, C#, and G#.  
Measure 32:  
- The first piano part (top) has a treble clef and contains a whole rest.  
- The second piano part (middle) has a bass clef and contains a whole rest.  
- The third piano part (bottom) has a bass clef and contains a whole rest.  
A long, curved line (a slur) connects the bottom of the first piano part in measure 31 to the bottom of the third piano part in measure 32.
